# Supplementary material
Source: publisher site journal article supplement (https://www.dovepress.com/article/216642)
Supplement: Supplementary file 1 [file get_supplementary_file.php]

## Default Question Block

Thank you for taking time to respond to this brief survey. In our continuing efforts to try to improve our programming, we would like you to reflect upon the communication skills course that you completed in the Medical Education Department.

Completion of the survey indicates your consent to this research project. The survey software is programmed to keep your data anonymous for any presentation or publication of results.

Please try to answer the following questions as completely as possible.

Please read carefully and then mark your agreement with each of the following items.

|                                                                                                                        | Strongly agree        | Somewhat agree        | Neither agree nor disagree | Somewhat disagree     | Strongly disagree     |
|------------------------------------------------------------------------------------------------------------------------|-----------------------|-----------------------|----------------------------|-----------------------|-----------------------|
| I learned new skills from the communication skills course.                                                             | <input type="radio"/> | <input type="radio"/> | <input type="radio"/>      | <input type="radio"/> | <input type="radio"/> |
| I have been able to use what I learned in the communication skills course in my daily work with patients and families. | <input type="radio"/> | <input type="radio"/> | <input type="radio"/>      | <input type="radio"/> | <input type="radio"/> |
| I never think about what I learned in the communication skills course.                                                 | <input type="radio"/> | <input type="radio"/> | <input type="radio"/>      | <input type="radio"/> | <input type="radio"/> |
| The skills and topics taught in the communication skills course are important to my success as a physician.            | <input type="radio"/> | <input type="radio"/> | <input type="radio"/>      | <input type="radio"/> | <input type="radio"/> |

As you may recall, the communication skills course focused on the skills found in this [Skills list](#). Which skill or skills that you learned from the course have you been able to implement into your clinical practice most successfully?

Which skill or skills that you learned from the course have you NOT been able to implement into your clinical practice?

What have been the barriers to implementing these skills?

Thank you for your input. Lastly, we have just a few questions for your to help us understand who is completing the survey.

Gender

Male

Female

Role when you took the course

Resident

Fellow

Specialist

Consultant

Other

If you would be willing to come to a focus group to talk further about these issues, please write your corporation number here.

Powered by Qualtrics
